# Supplementary material for: Enzymatic synthesis of N -formylated sialosides via a five-enzyme cascade
Source: Royal Society of Chemistry journal article supplement (doi:10.1039/d4ob00874j), 2024-01-01
Supplement: d4ob00874j1.pdf [file d4ob00874j1.pdf]

## Supporting Information

### Enzymatic Synthesis of *N*-Formylated Sialosides *via* a Five-Enzyme Cascade

Zi-Xuan Hu, Shu-Rui Li, Qing-Jun Xia, Ting Wang, Josef Voglmeir, Göran Widmalm, and Li Liu

#### Contents

Figure S1. Schematic structure of Neu5FoGalX with selected atom labeling.

Figure S2. <sup>1</sup>H and <sup>13</sup>C NMR spectra of Neu5FoGalX.

Table S1. Negative ESI-MS from Neu5FoGalX.

Figure S3. UPLC-ESI-MS identification of Neu5FoGalX after five-enzyme synthesis reaction.

Figure S4. UPLC-ESI-MS identification of Neu5AcGalX after five-enzyme synthesis reaction.

Table S2. UPLC elution procedure of preparative C18 reverse phase separation for Neu5FoGalX.

Figure S5. UV spectra for Neu5FoGalX purification by UPLC with C18 preparative column.

Figure S6. Scheme of five-enzyme cascade and procedure of synthesis and purification for Neu5FoGalX.

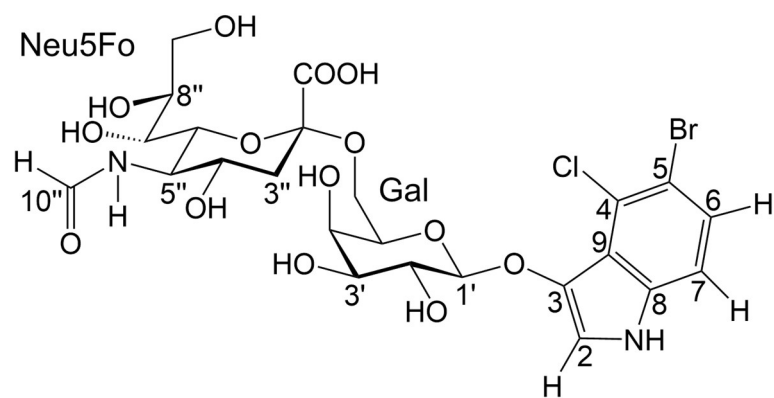

**Figure S1.** Schematic structure of Neu5FoGalX with selected atom labeling.

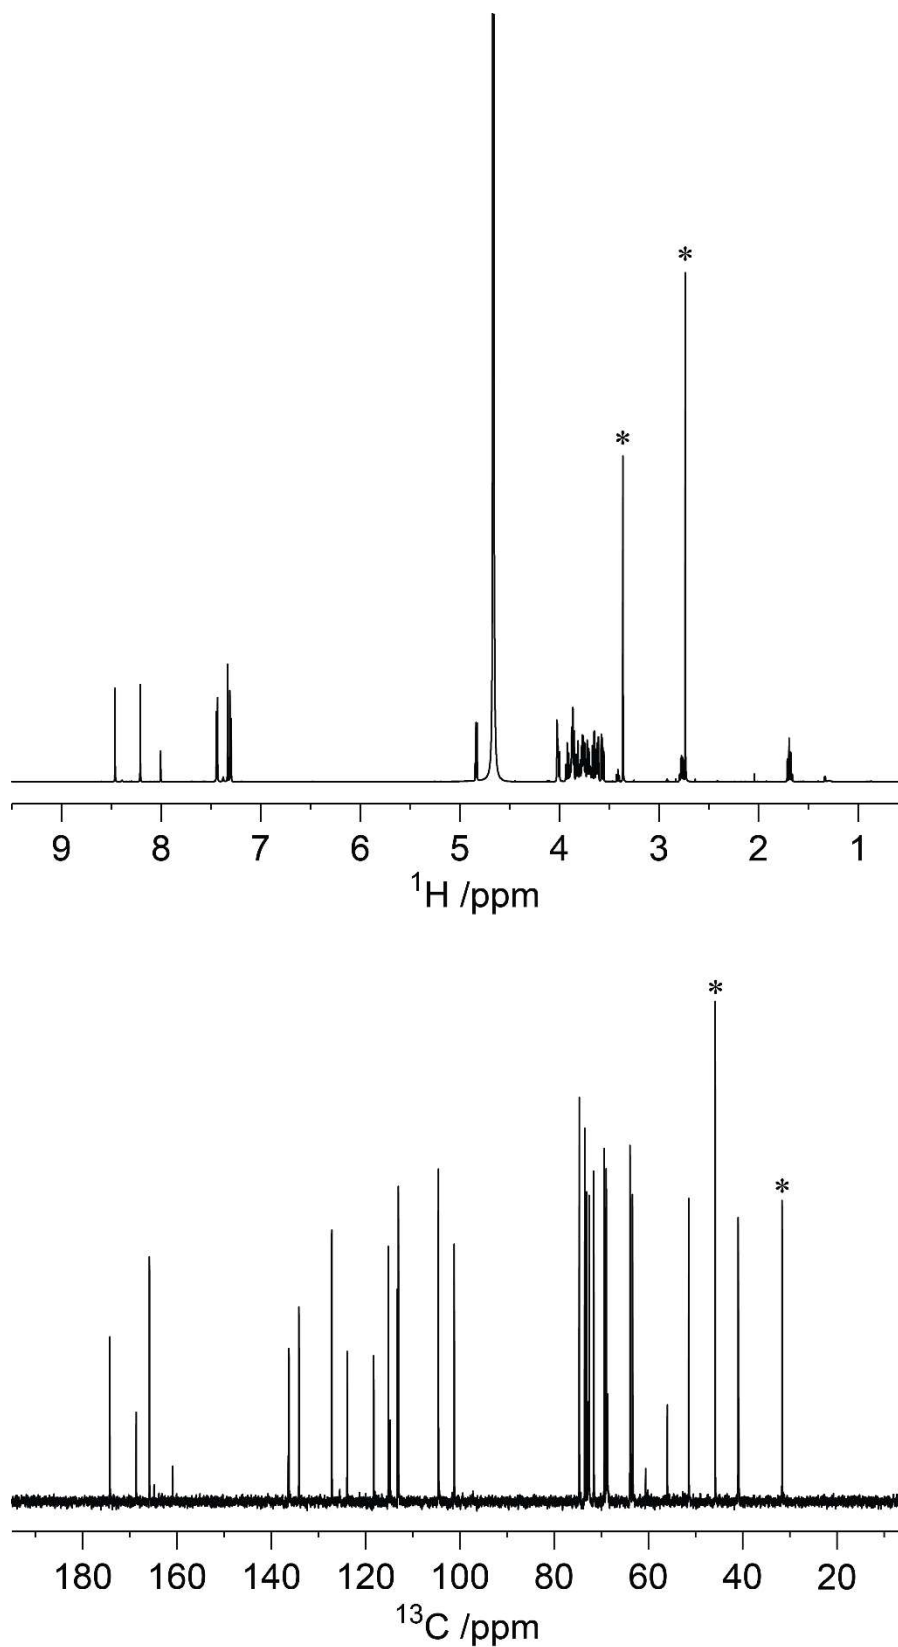

**Figure S2.**  $^1\text{H}$  and  $^{13}\text{C}$  NMR spectra (top and bottom, respectively) of a Neu5FoGalX-preparation. Resonances from an impurity are indicated by asterisks. The  $^1\text{H}$  NMR signals originating from the small molecule impurity were possible to suppress by a diffusion-edited  $^1\text{H}$  NMR experiment.

**Table S1.** Negative ESI-MS of pseudomolecular ion  $[M-H]^-$  from Neu5FoGalX, which as a neutral compound has a molecular formula of  $C_{24}H_{30}BrClN_2O_{14}$ .

| Experiment ( $m/z$ ) | Relative intensity | Simulation ( $m/z$ ) | Relative intensity |
|----------------------|--------------------|----------------------|--------------------|
| 683.0508             | 74                 | 683.0496             | 74                 |
| 684.0578             | 28                 | 684.0530             | 20                 |
| 685.0502             | 100                | 685.0476             | 100                |
| 686.0503             | 30                 | 686.0509             | 27                 |
| 687.0485             | 32                 | 687.0448             | 29                 |
| 688.0569             | 13                 | 688.0480             | 7                  |

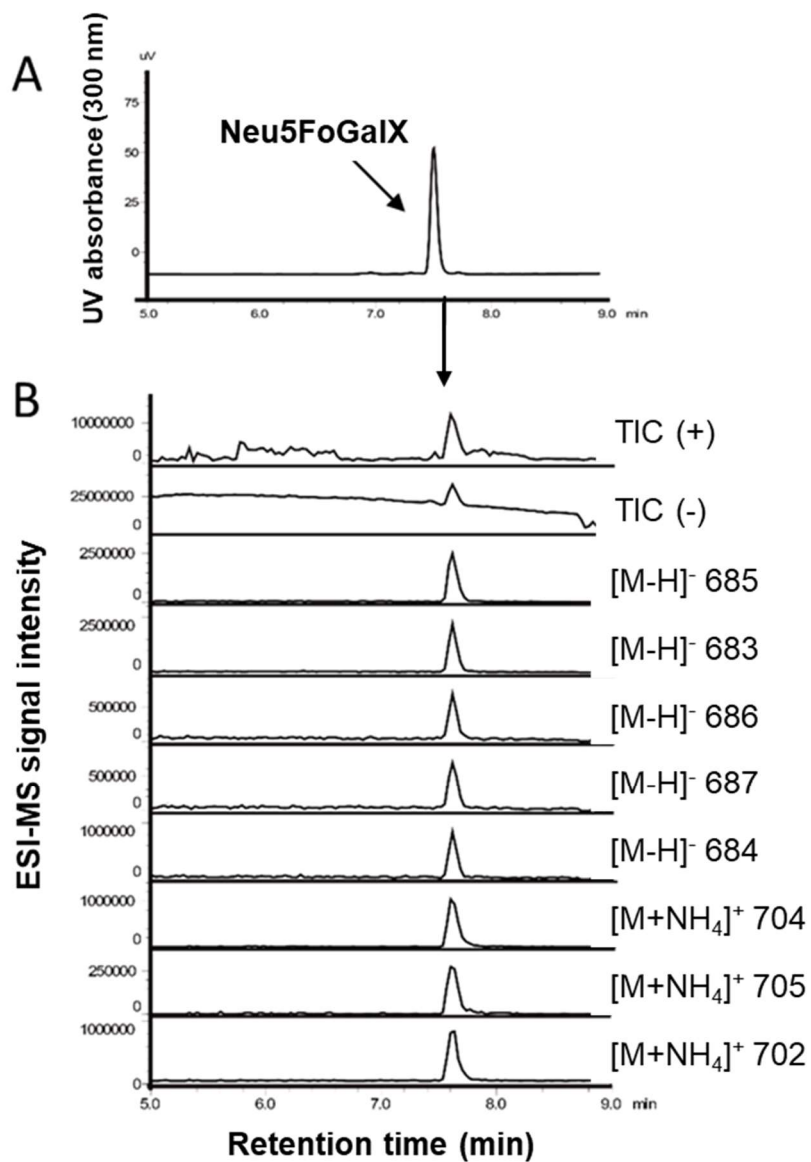

**Figure S3.** UPLC-ESI-MS identification of Neu5FoGalX after five-enzyme synthesis reaction. **(A)** UV absorbance spectra (300 nm) of Neu5FoGalX. **(B)** Total ion count (TIC) and extracted ion count (EIC) chromatogram profiles of Neu5FoGalX. The conversion was 100 % calculated from the UV-ratios of Neu5FoGalX to GalX.

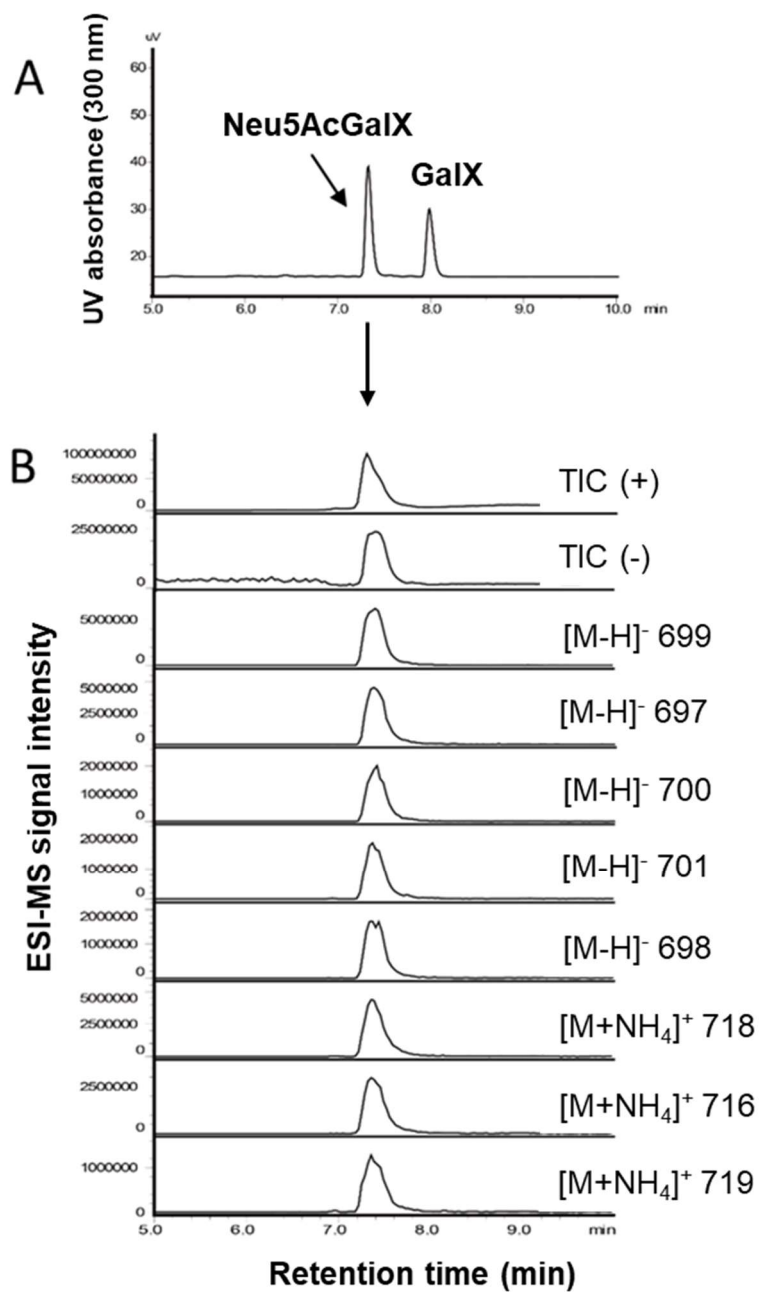

**Figure S4.** UPLC-ESI-MS identification of Neu5AcGalX after five-enzyme synthesis reaction. **(A)** UV absorbance spectra (300 nm) of Neu5AcGalX. **(B)** Total ion count (TIC) and extracted ion count (EIC) chromatogram profiles of Neu5AcGalX. The conversion was 70% calculated from the UV-ratios of Neu5AcGalX to GalX.

**Table S2.** UPLC elution procedure of preparative C18 reverse phase separation for Neu5FoGalX purification.

| Time (min) | Module     | Command         | Value |
|------------|------------|-----------------|-------|
| 0          | Pumps      | Solvent B Conc. | 10    |
| 40         | Pumps      | Solvent B Conc. | 30    |
| 41         | Pumps      | Solvent B Conc. | 90    |
| 50         | Pumps      | Solvent B Conc. | 90    |
| 55         | Pumps      | Solvent B Conc. | 10    |
| 75         | Pumps      | Solvent B Conc. | 10    |
| 75         | Controller | Stop            |       |

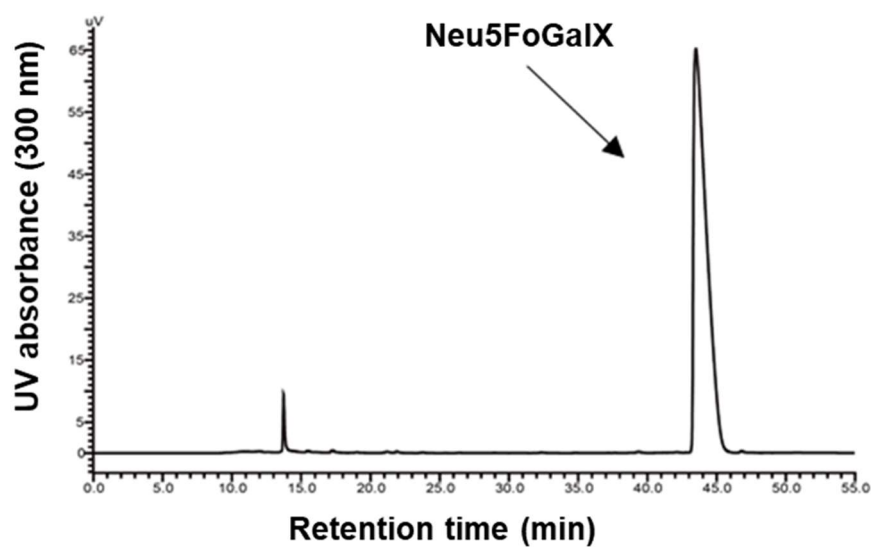

**Figure S5.** UV spectra for Neu5FoGalX purification by UPLC with C18 preparative reverse phase column.

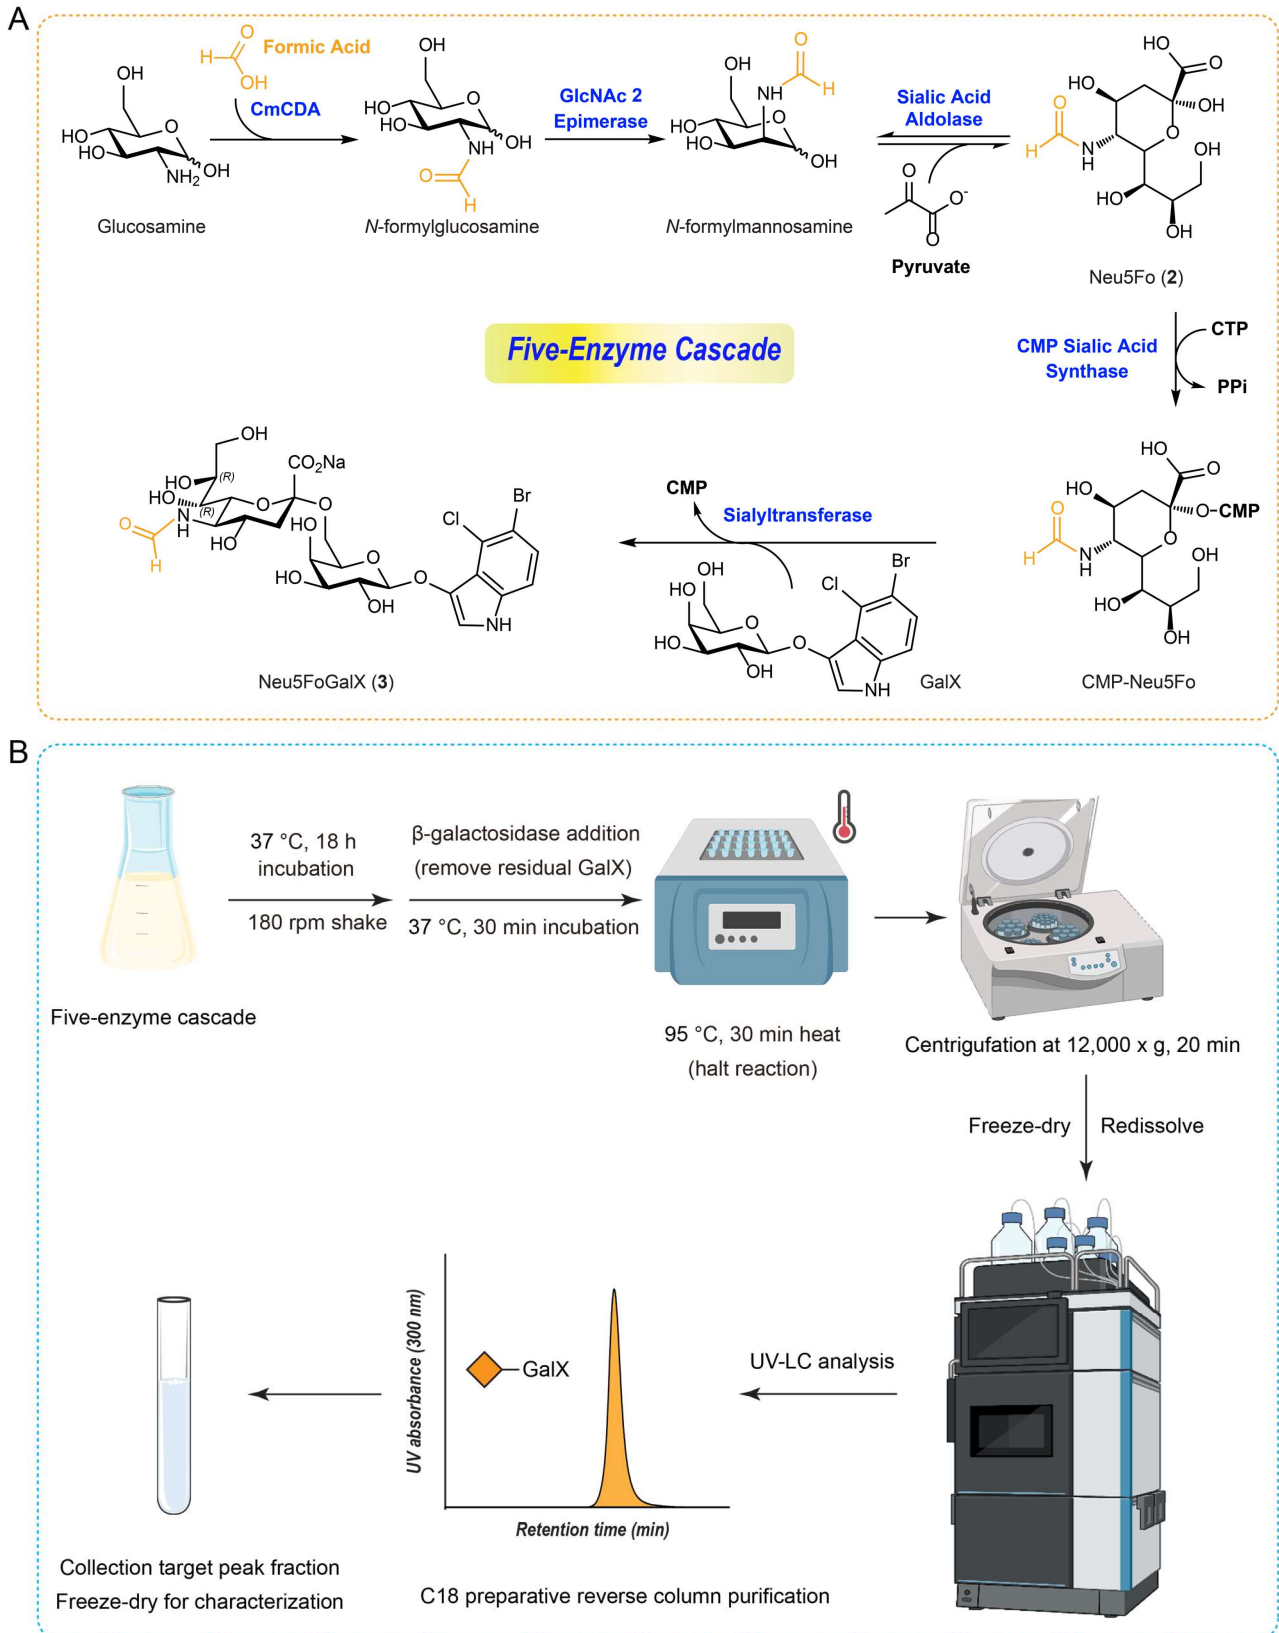

**Figure S6.** Scheme of five-enzyme cascade (A) and procedure of synthesis and purification for Neu5FoGalX (B).
